# Supplementary material for: Lumbar endplate microfracture injury induces Modic-like changes, intervertebral disc degeneration and spinal cord sensitization – An In Vivo Rat Model
Source: PubMed Central journal article supplement — bioRxiv. 2023 Jan 30:2023.01.27.525924. Preprint. [Version 1] doi: 10.1101/2023.01.27.525924 (PMC9915494; doi:10.1101/2023.01.27.525924), 2023-01-30
Supplement: NIHPP2023.01.27.525924v1-supplement-1.pdf [file NIHPP2023.01.27.525924v1-supplement-1.pdf]

1

2

3

4

5

6

7

8

9

10

11

12

13

14

15

16

17

18 **Supplementary Figure 1:** IVD height measured from Faxitron images showing effects  
19 of level. L2-3 and L3-4 were uninjured while L4-5 and L5-6 were injured levels. \* and  
20 \*\*\*\* indicate significant differences with  $p < 0.05$  and  $p < 0.0001$  respectively.

21 **Supplementary Figure 2:** Hematoxylin and Eosin staining of IVDs showing  
22 disruption of IVD structure and inflammatory cell invasion into the IVD in both  
23 EP+PBS and EP+TNF injury groups.

24

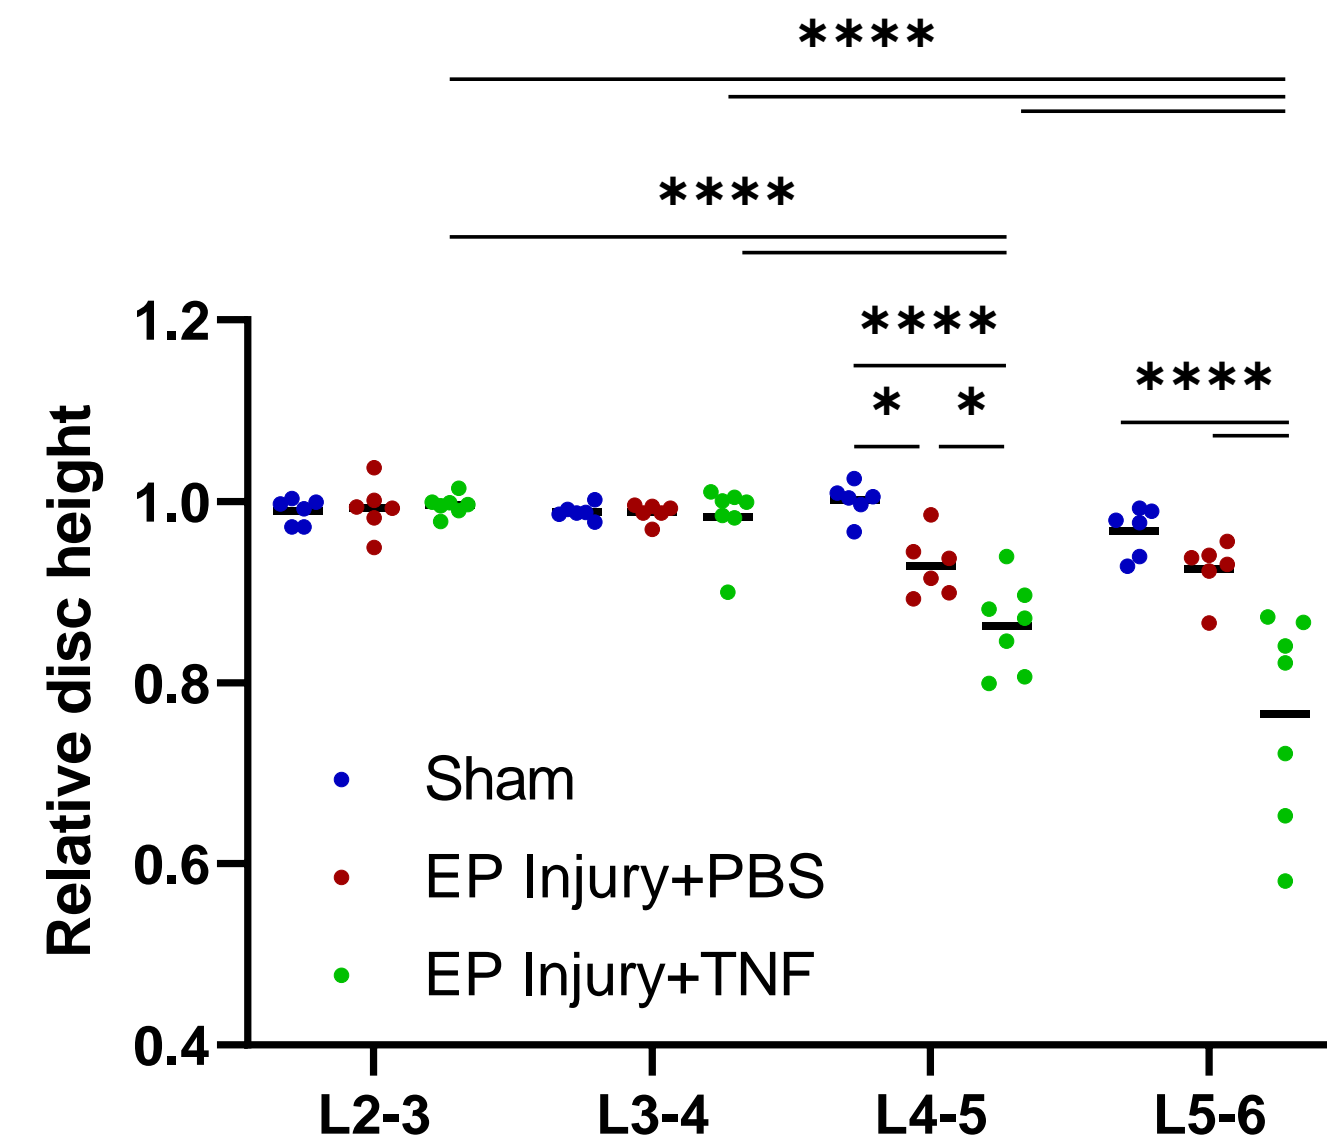

Supplementary Figure 1:



Sham

EP+ PBS

EP+ TNF $\alpha$

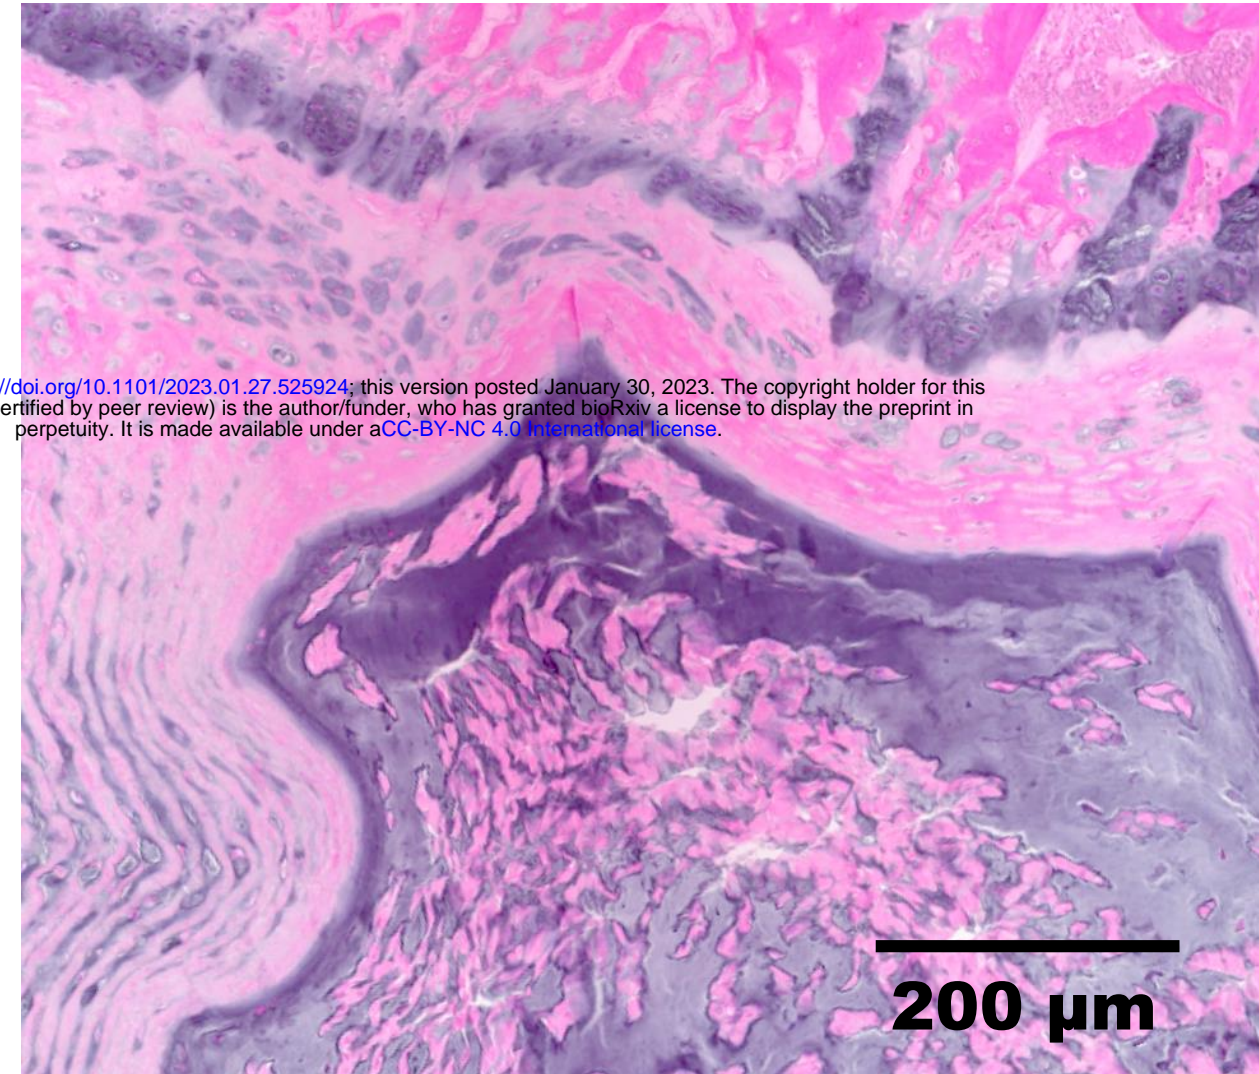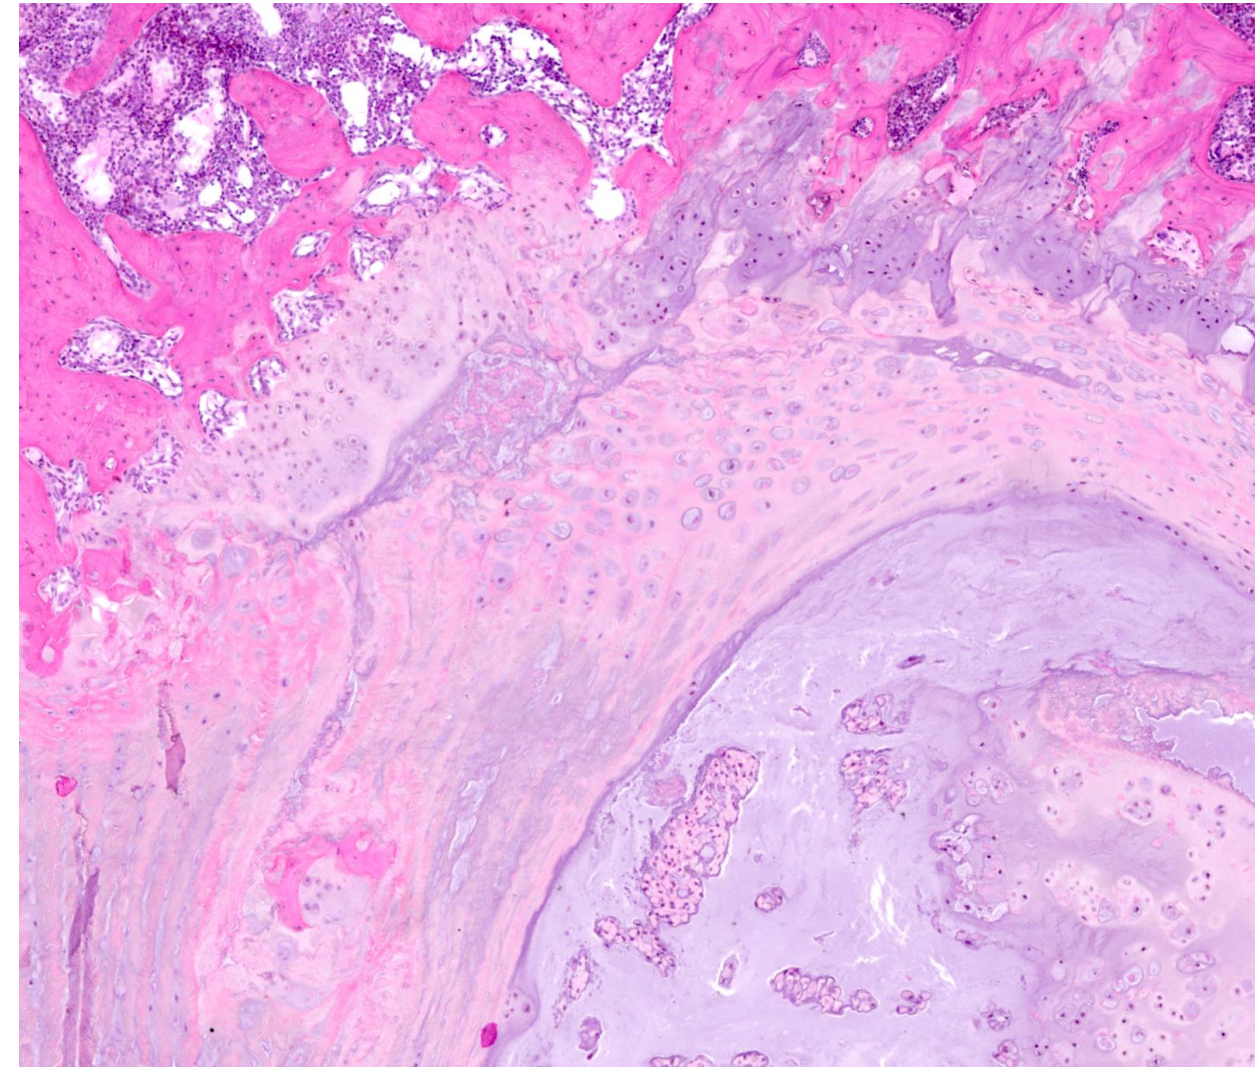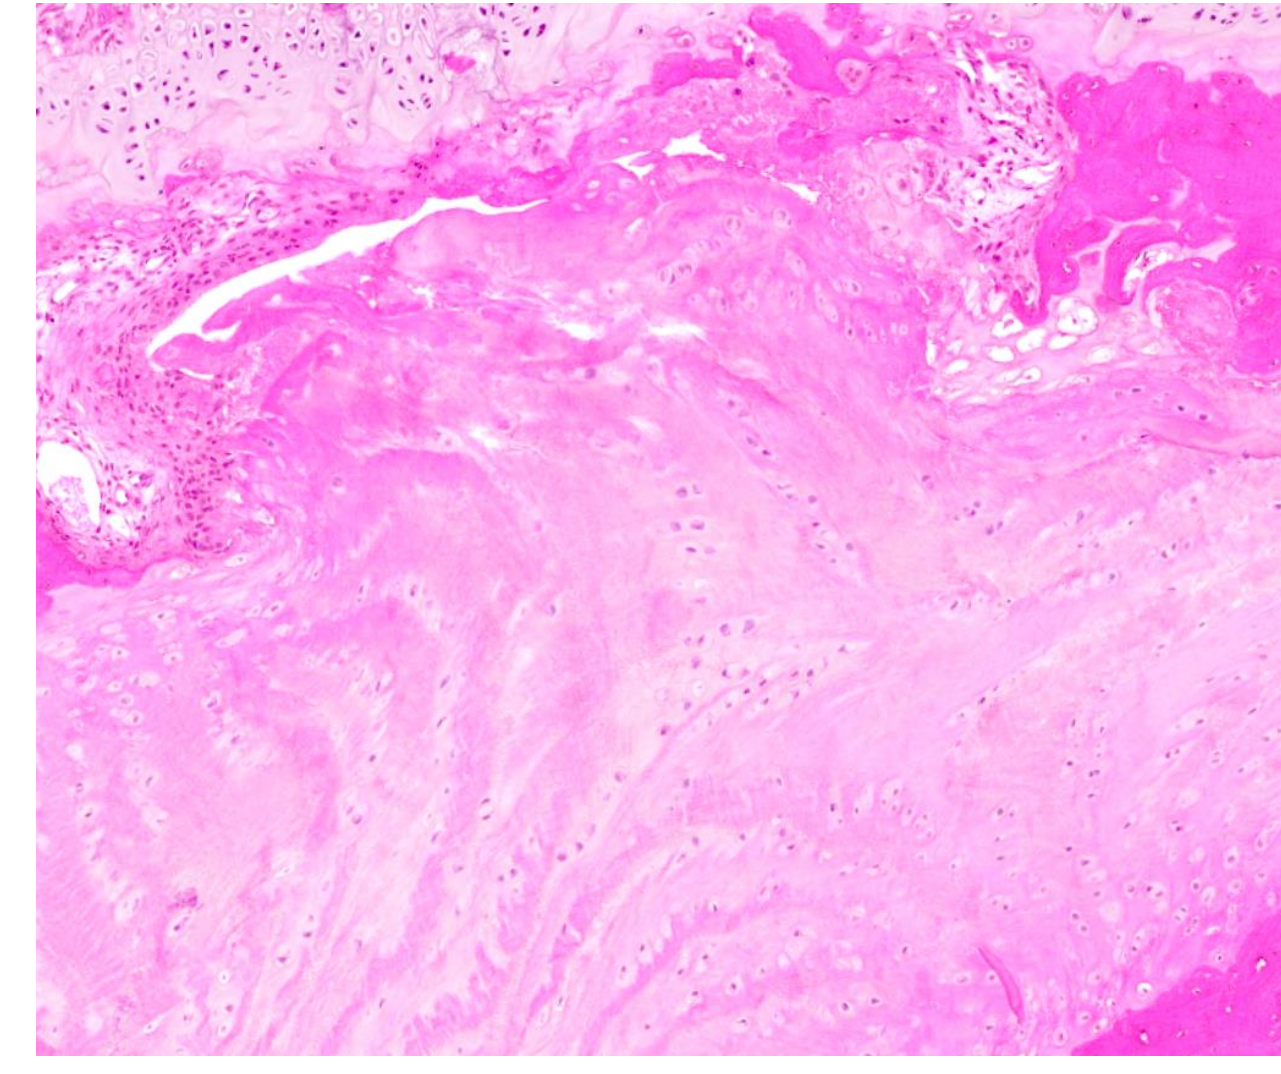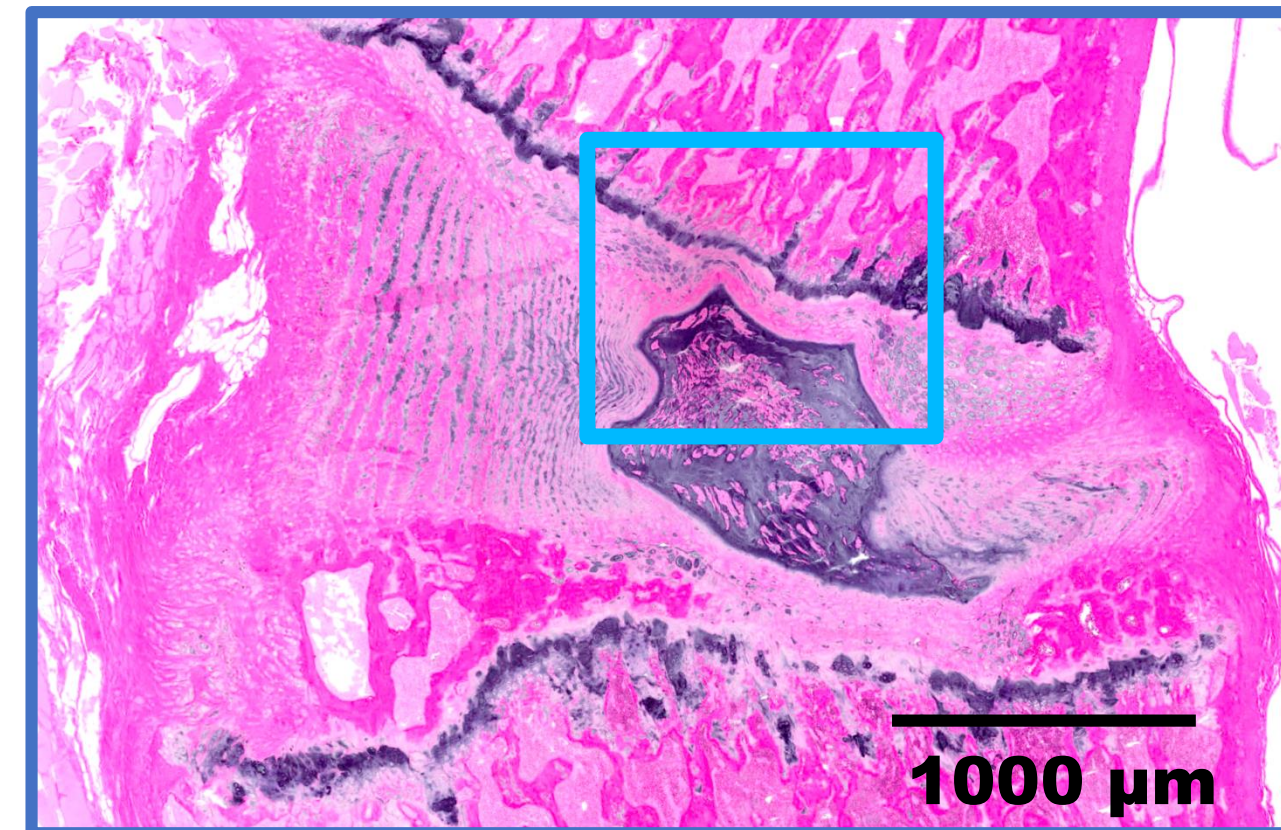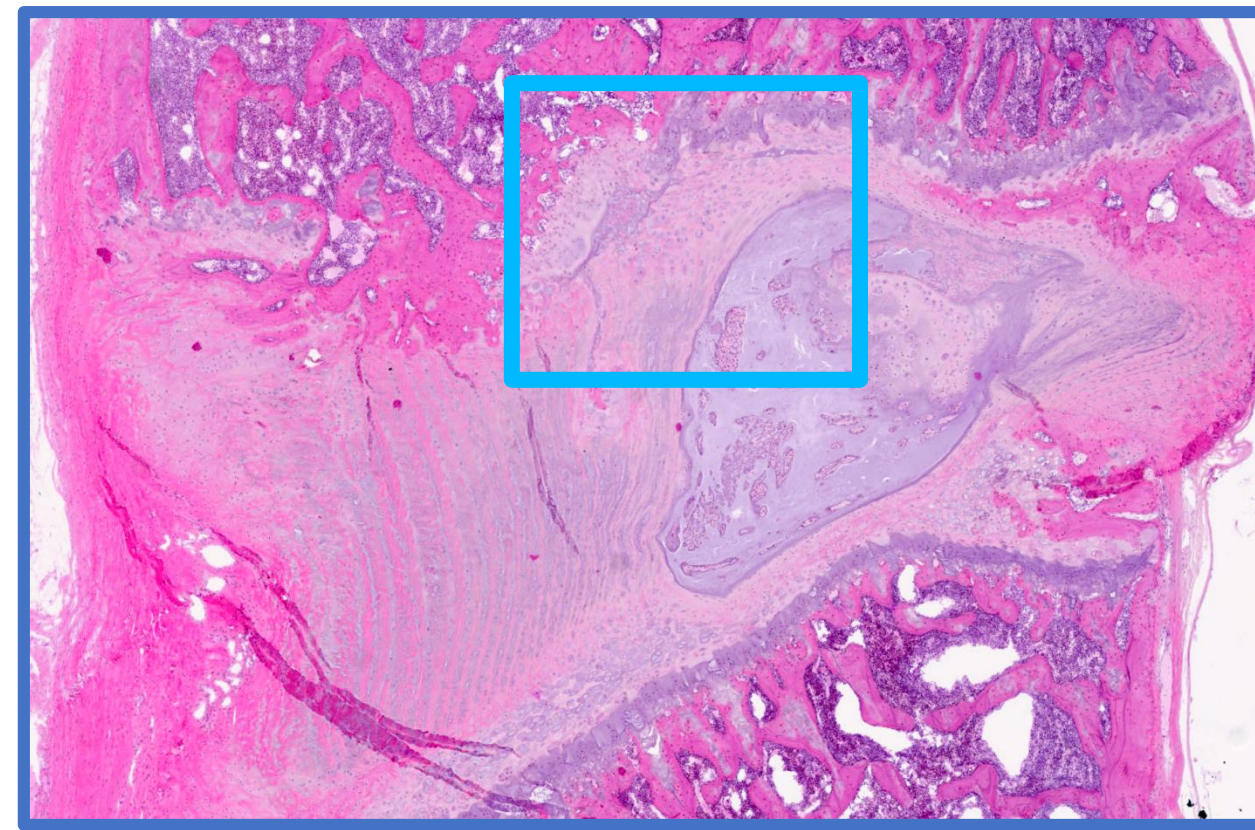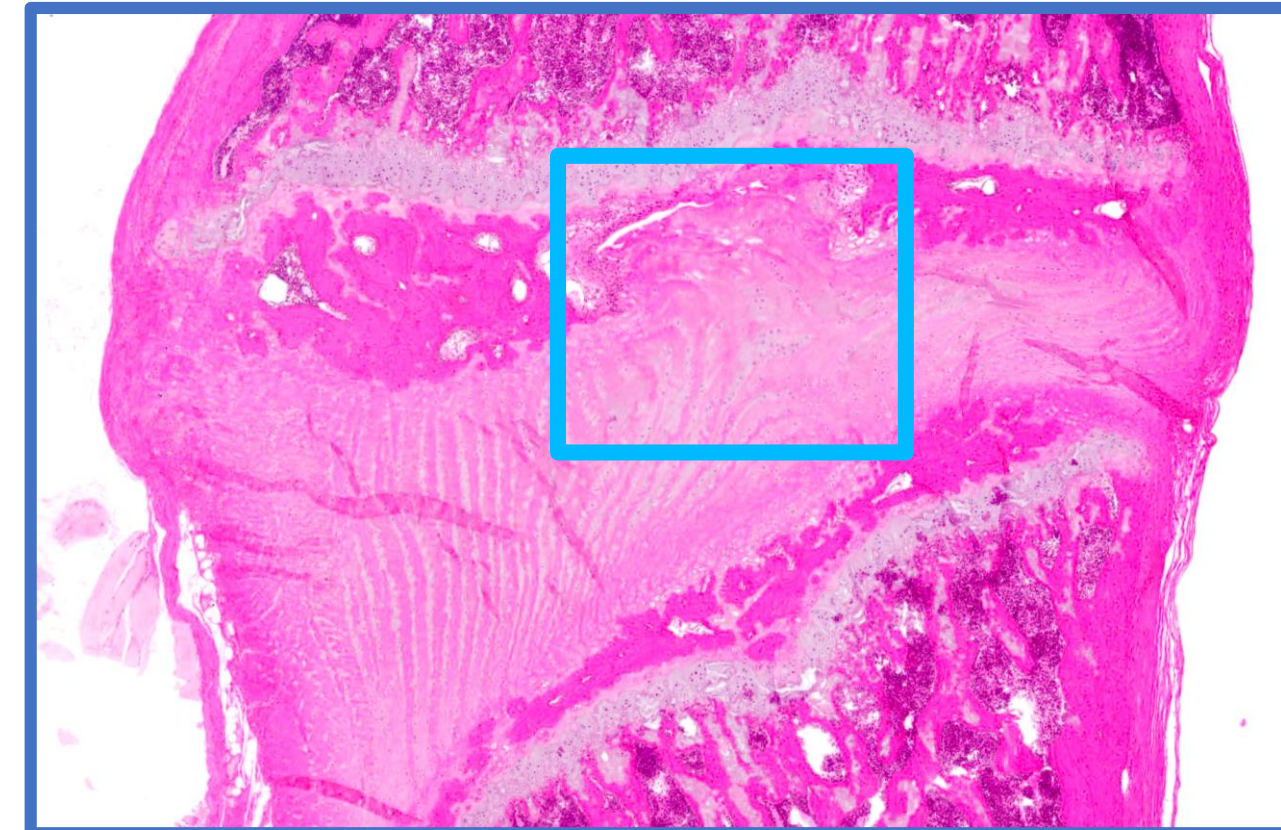

Supplementary Figure 2:
